# Supplementary material
Source: publisher figshare collection journal article supplement (https://tandf.figshare.com/articles/dataset/_/4834040)
Supplement: Supplementary file 1 [file 1]

## Supplemental Appendix 1. Clinical Investigators

Teresa Coelho, MD (Unidade Clinica de Paramiloidose, Hospital de Santo António, Porto, Portugal, Principal Investigator)

Luis F. Maia, MD (Unidade Clinica de Paramiloidose, Hospital de Santo António, Porto, Portugal, Sub-investigator)

Ana Martins da Silva, MD (Unidade Clinica de Paramiloidose, Hospital de Santo António, Porto, Portugal, Sub-investigator)

Márcia Waddington Cruz, MD (Hospital Universitário Clementino Fraga Filho, Federal University of Rio de Janeiro, Rio de Janeiro, Brazil, Principal Investigator)

Ole B. Suhr, MD (Department of Public Health and Clinical Medicine, Umeå, University, Umeå, Sweden, Principal Investigator)

Pedro L. Trigo, MD (Fundación para la Lucha contra las Enfermedades Neurológicas de la Infancia (FLENI), Buenos Aires, Argentina, Principal Investigator)

Violaine Planté-Bordeneuve, MD (CHU Henri Mondor, Créteil, France, Principal Investigator)

Hartmut H.-J. Schmidt, MD (Universitätsklinikum Münster, Münster, Germany, Principal Investigator)

Isabel Conceição, MD (Hospital de Santa Maria, Lisbon, Portugal, Principal Investigator)

Josep M. Campistol, MD (Hospital Clinic Villarroel, Barcelona, Spain, Principal Investigator)
